# Supplementary material for: Diagnostic and Prognostic Validity of Proadrenomedullin among Neonates with Sepsis in Tertiary Care Hospitals of Southern India
Source: Int J Pediatr. 2018 Aug 1;2018:7908148. doi: 10.1155/2018/7908148 (PMC6092974; doi:10.1155/2018/7908148)
Supplement: Supplementary Materials — Datasets used and analyzed during the current study. [file 7908148.f1.xlsx]

## Sheet: Sheet1
SERIAL NO	HOSPITAL NO	GESTATIONAL AGE	SEX	BIRTH WT	PLACE OF BIRTH	MODE OF DELIVERY	AGE AT PRESENTATION	TEMPERATURE INSTABILITY	CVS	RS	GI	NON SPECIFIC	PETECHIAE/SCLEREMA	CVS	RS	ABD	CNS	LENGTH OF NICU STAY	TLC	IT RATIO	MICRO ESR	CRP	BLOOD CULTURE	PADM1	PADM2	OUTCOME
CO1	1612601/A	TERM	FEMALE	2.9KG	INBORN	EL LSCS	4TH DAY	NO	NO	NO	NO	NO	NO	N	N	N	N	2DAYS						9.36		IMPROVED
CO2	1612678/C	TERM	MALE	2.27KG	INBORN	NVD	4TH DAY	NO	NO	NO	NO	NO	NO	N	N	N	N	2DAYS						4.97		IMPROVD
CO3	1612617/A	TERM	MALE	3.56KG	INBORN	EM LSCS	5TH DAY	NO	NO	NO	NO	NO	NO	N	N	N	N	1DAY						8.47		IMPROVED
CO4	1612737/A	TERM	FEMALE	2.7KG	INBORN	NVD	3RD DAY	NO	NO	NO	NO	NO	NO	N	N	N	N	1DAY						6.79		IMPROVED
CO5	1612930/B	PRE(35WK)	MALE	2.43KG	INBORN	EM LSCS	3RD DAY	NO	NO	NO	NO	NO	NO	N	N	N	N	1DAY						8.69		IMPROVED
CO6	1613022/B	TERM	FEMALE	2.7KG	INBORN	NVD	4TH DAY	NO	NO	NO	NO	NO	NO	N	N	N	N	1DAY						8.96		IMPROVED
CO7	1613057/B	TERM	MALE	2.47KG	INBORN	NVD	4TH DAY	NO	NO	NO	NO	NO	NO	N	N	N	N	1DAY						7.09		IMPROVED
CO8	1613093/B	PRE(36WK)	MALE	1.93KG	INBORN	NVD	3RD DAY	NO	NO	NO	NO	NO	NO	N	N	N	N	2DAYS						2.98		IMPROVED
CO9	1613144/A	TERM	FEMALE	2.25KG	INBORN	EM LSCS	4TH DAY	NO	NO	NO	NO	NO	NO	N	N	N	N	1DAY						3.23		IMPROVED
CO10	1613161/B	PRE(36WK)	FEMALE	2.31KG	INBORN	EM LSCS	4TH DAY	NO	NO	NO	NO	NO	NO	N	N	N	N	1DAY						8.58		IMPROVED
CO11	1613266/A	TERM	FEMALE	2.35KG	INBORN	EL LSCS	3RD DAY	NO	NO	NO	NO	NO	NO	N	N	N	N	1DAY						4.41		IMPROVED
CO12	1613267/A	TERM	FEMALE	2.44KG	INBORN	EL LSCS	4TH DAY	NO	NO	NO	NO	NO	NO	N	N	N	N	1DAY						5.07		IMPROVED
CO13	1613270/C	TERM	MALE	2.79KG	INBORN	NVD	4TH DAY	NO	NO	NO	NO	NO	NO	N	N	N	N	1DAY						11.1		IMPROVED
CO14	1613309/B	TERM	MALE	2.76KG	INBORN	NVD	4TH DAY	NO	NO	NO	NO	NO	NO	N	N	N	N	1DAY						6.68		IMPROVED
CO15	1613326/C	TERM	FEMALE	3.25KG	INBORN	NVD	4TH DAY	NO	NO	NO	NO	NO	NO	N	N	N	N	1DAY						5.14		IMPROVED
CO16	1613348/C	PRE(34WK)	FEMALE	2.24KG	INBORN	EM LSCS	4TH DAY	NO	NO	NO	NO	NO	NO	N	N	N	N	2DAYS						9.36		IMPROVED
CO17	1613247/A	TERM	MALE	2.82KG	INBORN	EL LSCS	4TH DAY	NO	NO	NO	NO	NO	NO	N	N	N	N	2DAYS						3.31		IMPROVED
CO18	1613390/B	PRE(36WK)	FEMALE	2.33KG	INBORN	NVD	3RD DAY	NO	NO	NO	NO	NO	NO	N	N	N	N	2DAYS						7.3		IMPROVED
CO19	1613407/B	TERM	MALE	2.67KG	INBORN	NVD	4TH DAY	NO	NO	NO	NO	NO	NO	N	N	N	N	1DAY						6.22		IMPROVED
CO20	1613414/C	PRE(36WK)	FEMALE	2.4KG	INBORN	NVD	4TH DAY	NO	NO	NO	NO	NO	NO	N	N	N	N	2DAYS						7.71		IMPROVED
CO21	1613443/C	TERM	FEMALE	2.5KG	INBORN	NVD	4TH DAY	NO	NO	NO	NO	NO	NO	N	N	N	N	1DAY						7.14		IMPROVED
CO22	1613387/A	TERM	MALE	3.27KG	INBORN	NVD	4TH DAY	NO	NO	NO	NO	NO	NO	N	N	N	N	2DAYS						3.53		IMPROVED
CO23	1613474/A	TERM	MALE	2.98KG	INBORN	EL LSCS	4TH DAY	NO	NO	NO	NO	NO	NO	N	N	N	N	1DAY						5.21		IMPROVED
CO24	1613381/A	TERM	FEMALE	2.6KG	INBORN	EL LSCS	4TH DAY	NO	NO	NO	NO	NO	NO	N	N	N	N	2DAYS						11.13		IMPROVED
CO25	1700006/C	TERM	MALE	2.46KG	INBORN	NVD	3RD DAY	NO	NO	NO	NO	NO	NO	N	N	N	N	1DAY						6.35		IMPROVED
CO26	1700011/C	TERM	FEMALE	3.15KG	INBORN	EL LSCS	4TH DAY	NO	NO	NO	NO	NO	NO	N	N	N	N	1DAY						2.73		IMPROVED
CO27	1700061/A	TERM	FEMALE	2.24KG	INBORN	NVD	3RD DAY	NO	NO	NO	NO	NO	NO	N	N	N	N	1DAY						7.47		IMPROVED
CO28	1700072/B	TERM	FEMALE	2.84KG	INBORN	EM LSCS	4TH DAY	NO	NO	NO	NO	NO	NO	N	N	N	N	1DAY						4.19		IMPROVED
CO29	1700076/B	PRE(36WK)	FEMALE	2.69KG	INBORN	NVD	3RD DAY	NO	NO	NO	NO	NO	NO	N	N	N	N	2DAYS						3.53		IMPROVED
CO30	17000914/B	PRE(34WK)	FEMALE	2.15KG	INBORN	NVD	5TH DAY	NO	NO	NO	NO	NO	NO	N	N	N	N	2DAYS						9.52		IMPROVED
CO31	1700111/B	TERM	MALE	2.34KG	INBORN	EM LSCS	4TH DAY	NO	NO	NO	NO	NO	NO	N	N	N	N	1DAY						4.19		IMPROVED
CO32	1700134/C	PRE(36WK)	FEMALE	2.37KG	INBORN	NVD	4TH DAY	NO	NO	NO	NO	NO	NO	N	N	N	N	1DAY						2.12		IMPROVED
CO33	1700153/C	TERM	MALE	2.3KG	INBORN	NVD	4TH DAY	NO	NO	NO	NO	NO	NO	N	N	N	N	1DAY						3.09		IMPROVED
CO34	1614029/B	TERM	MALE	3.02KG	INBORN	NVD	5TH DAY	NO	NO	NO	NO	NO	NO	N	N	N	N	2DAYS						2.83		IMPROVED
CO35	1700176/A	TERM	FEMALE	3.11KG	INBORN	EM LSCS	4TH DAY	NO	NO	NO	NO	NO	NO	N	N	N	N	1DAY						2.33		IMPROVED
CO36	1700018/C	TERM	FEMALE	3.78KG	INBORN	NVD	4TH DAY	NO	NO	NO	NO	NO	NO	N	N	N	N	1DAY						5.22		IMPROVED
CO37	1700189/A	TERM	FEMALE	2.84KG	INBORN	NVD	4TH DAY	NO	NO	NO	NO	NO	NO	N	N	N	N	1DAY						1.46		IMPROVED
CO38	1700195/B	PRE(36WK)	FEMALE	2.37KG	INBORN	NVD	4TH DAY	NO	NO	NO	NO	NO	NO	N	N	N	N	2DAYS						3.73		IMPROVED
CO39	1700223/B	PRE(36WK)	MALE	2.28KG	INBORN	NVD	4TH DAY	NO	NO	NO	NO	NO	NO	N	N	N	N	1DAY						8.71		IMPROVED
CO40	1700167/A	TERM	MALE	2.63KG	INBORN	NVD	4TH DAY	NO	NO	NO	NO	NO	NO	N	N	N	N	2DAYS						2.72		IMPROVED
CO41	1700199/C	PRE(34WK)	FEMALE	2.11KG	INBORN	NVD	4TH DAY	NO	NO	NO	NO	NO	NO	N	N	N	N	1DAY						3.73		IMPROVED
CO42	1700277/A	PRE(36WK)	FEMALE	2.19KG	INBORN	NVD	4TH DAY	NO	NO	NO	NO	NO	NO	N	N	N	N	1DAY						1.04		IMPROVED
CO43	1700430/A	TERM	MALE	2.86KG	INBORN	EL LSCS	5TH DAY	NO	NO	NO	NO	NO	NO	N	N	N	N	1DAY						7.69		IMPROVED
CO44	1700302/A	TERM	MALE	2.44KG	INBORN	NVD	3RD DAY	NO	NO	NO	NO	NO	NO	N	N	N	N	1DAY						2.72		IMPROVED
CO45	1700320/A	TERM	MALE	2.7KG	INBORN	EM LSCS	4TH DAY	NO	NO	NO	NO	NO	NO	N	N	N	N	2DAYS						2.62		IMPROVED
CO46	1700370/C	PRE(36WK)	MALE	2.28KG	INBORN	NVD	4TH DAY	NO	NO	NO	NO	NO	NO	N	N	N	N	1DAY						1.65		IMPROVED
CO47	1700240/A	TERM	FEMALE	3.38KG	INBORN	EL LSCS	4TH DAY	NO	NO	NO	NO	NO	NO	N	N	N	N	2DAYS						2.43		IMPROVED
CO48	1700274/A	TERM	MALE	2.87KG	INBORN	NVD	4TH DAY	NO	NO	NO	NO	NO	NO	N	N	N	N	1DAY						5.89		IMPROVED
CO49	1700350/B	TERM	FEMALE	2.29KG	INBORN	NVD	5TH DAY	NO	NO	NO	NO	NO	NO	N	N	N	N	1DAY						7.78		IMPROVED
CO50	1700322/B	TERM	FEMALE	2.91KG	INBORN	EL LSCS	4TH DAY	NO	NO	NO	NO	NO	NO	N	N	N	N	2DAYS						9.82		IMPROVED
CO51	1700454/B	PRE(36WK)	FEMALE	2.14KG	INBORN	NVD	4TH DAY	NO	NO	NO	NO	NO	NO	N	N	N	N	2DAYS						4.48		IMPROVED
CO52	1700487/B	PRE(36WK)	FEMALE	2.09KG	INBORN	NVD	5TH DAY	NO	NO	NO	NO	NO	NO	N	N	N	N	1DAY						7.21		IMPROVED
CO53	1700428/A	TERM	MALE	3.08KG	INBORN	EM LSCS	4TH DAY	NO	NO	NO	NO	NO	NO	N	N	N	N	2DAYS						1.21		IMPROVED
CO54	1700512/C	TERM	MALE	2.91KG	INBORN	NVD	4TH DAY	NO	NO	NO	NO	NO	NO	N	N	N	N	1DAY						4.73		IMPROVED
CA1	1611823/C	TERM	MALE	2.62KG	INBORN	EM LSCS	4TH DAY	Y	NO	NO	NO	Y	NO	N	N	N	N	3DAYS	N	Y	Y	Y	N	22.27	2.98	IMPROVED
CA2	1612802/D	TERM	FEMALE	2.85KG	INBORN	NVD	3RD DAY	Y	NO	NO	Y	Y	NO	N	N	N	N	3DAYS	N	N	Y	Y	N	27.95	6.02	IMPROVED
CA3	1613085/C	PRE(34WK)	FEMALE	1.39KG	INBORN	EM LSCS	2ND DAY	Y	NO	Y	NO	Y	NO	N	ABNORMAL	N	ABNORMAL	13DAYS	Y	N	Y	Y	N	41.39	8.99	IMPROVED
CA4	1613041/A	PRE(34WK)	FEMALE	1.08KG	INBORN	EM LSCS	4TH DAY	Y	NO	Y	Y	NO	NO	N	ABNORMAL	N	ABNORMAL	3DAYS	Y	Y	Y	Y	N	45.44		EXPIRED
CA5	1613085/C	PRE(34WK)	FEMALE	1.39KG	INBORN	EM LSCS	2ND DAY	Y	NO	Y	NO	Y	NO	ABNORMAL	N	N	N	12DAYS	N	Y	Y	Y	N	27.85	12.23	IMPROVED
CA6	1613386/A	PRE(34WK)	FEMALE	1.81KG	INBORN	NVD	2ND DAY	Y	Y	Y	Y	NO	Y	N	ABNORMAL	N	ABNORMAL	2DAYS	Y	Y	Y	Y	Y (PSEUDOMAONAS SPECIES)	46.81		EXPIRED
CA7	1613439/C	TERM	FEMALE	2.25KG	OUTBORN	NVD	3RD DAY	NO	Y	Y	Y	Y	Y	N	ABNORMAL	N	ABNORMAL	8DAYS	Y	Y	Y	Y	N	45.39	48.82	EXPIRED
CA8	1613678/B	TERM	MALE	2.75KG	INBORN	NVD	6TH DAY	NO	Y	Y	Y	NO	NO	N	ABNORMAL	ABNORMAL	ABNORMAL	9DAYS	Y	Y	Y	Y	N	20.06	6.38	IMPROVED
CA9	1613743/A	PRE(34WK)	FEMALE	1.82KG	INBORN	NVD	3RD DAY	Y	Y	Y	NO	NO	Y	N	ABNORMAL	N	ABNORMAL	4DAYS	Y	N	Y	Y	N	17.87	4.41	IMPROVED
CA10	1613787/A	PRE(36WK)	MALE	2.1KG	INBORN	NVD	6TH DAY	NO	Y	NO	Y	Y	NO	ABNORMAL	ABNORMAL	ABNORMAL	ABNORMAL	14DAYS	Y	Y	Y	Y	N	48.07	38.77	EXPIRED
CA11	1613846/B	TERM	FEMALE	2.83KG	INBORN	NVD	4TH DAY	NO	NO	Y	Y	Y	NO	N	ABNORMAL	ABNORMAL	ABNORMAL	8DAYS	Y	Y	Y	Y	Y (KLEBSIELLA PNEUMONIAE)	34.67	46.02	EXPIRED
CA12	1613909/B	PRE(36WK)	MALE	2.36KG	INBORN	EM LSCS	5TH DAY	NO	Y	Y	Y	Y	NO	N	N	ABNORMAL	ABNORMAL	4DAYS	N	Y	Y	Y	N	46.73		EXPIRED
CA13	1614006/A	PRE(34WK)	MALE	1.08KG	INBORN	NVD	1ST DAY	Y	NO	Y	Y	Y	NO	N	ABNORMAL	ABNORMAL	ABNORMAL	8DAYS	Y	Y	Y	Y	N	31.83	4.67	IMPROVED
CA14	1614047/D	PRE(34WK)	MALE	1.17KG	INBORN	NVD	1ST DAY	Y	Y	Y	Y	NO	Y	N	ABNORMAL	ABNORMAL	ABNORMAL	5DAYS	Y	Y	N	Y	N	20.12	7.09	IMPROVED
CA15	1700003/C	PRE(36WK)	MALE	2.41KG	INBORN	EL LSCS	4TH DAY	NO	NO	NO	Y	Y	NO	N	N	N	ABNORMAL	6DAYS	Y	N	Y	Y	N	27.85	5.39	IMPROVED
CA16	1700046/A	PRE(34WK)	MALE	1.91KG	INBORN	NVD	3RD DAY	Y	Y	Y	NO	Y	NO	ABNORMAL	ABNORMAL	N	ABNORMAL	12 DAYS	Y	Y	N	Y	N	27.44	5.88	IMPROVED
CA17	1700137/C	PRE(34WK)	FEMALE	1.5KG	INBORN	NVD	3RD DAY	Y	Y	Y	NO	NO	Y	N	ABNORMAL	N	N	8DAYS	Y	N	N	Y	N	34.85	8.12	IMPROVED
CA18	1700176/A	TERM	FEMALE	2.16KG	INBORN	NVD	3RD DAY	NO	NO	NO	Y	Y	NO	N	N	N	ABNORMAL	5DAYS	N	N	Y	Y	N	19.06	2.98	IMPROVED
CA19	1700107/A	PRE(34WK)	FEMALE	1.9KG	INBORN	EM LSCS	5TH DAY	Y	Y	Y	NO	Y	NO	N	ABNORMAL	N	ABNORMAL	6DAYS	Y	N	Y	Y	N	41.09	48.92	EXPIRED
CA20	1700018/C	TERM	FEMALE	3.78KG	INBORN	NVD	4TH DAY	Y	NO	NO	Y	Y	NO	N	N	N	ABNORMAL	2DAYS	N	N	Y	Y	N	43.33		EXPIRED
CA21	1700223/B	TERM	MALE	2.28KG	INBORN	EL LSCS	5TH DAY	NO	NO	NO	Y	Y	NO	N	N	ABNORMAL	N	7DAYS	N	N	Y	Y	N	26.82	4.93	IMPROVED
CA22	1700189/A	TERM	FEMALE	2.84KG	INBORN	NVD	4TH DAY	Y	Y	NO	NO	Y	Y	N	N	N	ABNORMAL	9DAYS	Y	Y	Y	Y	Y(STREPTOCOCCUS SPECIES)	17.87	19.06	COMPLICATIONS
CA23	1700242/C	PRE(34WK)	MALE	1.58KG	INBORN	EM LSCS	7TH DAY	Y	Y	Y	NO	NO	Y	ABNORMAL	ABNORMAL	N	ABNORMAL	16DAYS	Y	Y	Y	Y	N	30.08	19.06	IMPROVED
CA24	1700199/C	PRE(36WK)	FEMALE	2.11KG	INBORN	NVD	3RD DAY	NO	NO	NO	Y	Y	NO	N	N	N	ABNORMAL	12DAYS	N	N	Y	Y	Y(STREPTOCOCCUS SPECIES)	27.2	13.36	IMPROVED
CA25	1700077/B	TERM	FEMALE	1.77KG	INBORN	EM LSCS	7TH DAY	Y	NO	Y	NO	Y	NO	N	ABNORMAL	N	ABNORMAL	21DAYS	Y	Y	N	Y	Y(MRSA)	29.32	13.1	IMPROVED
CA26	1700265/A	TERM	MALE	2.28KG	INBORN	NVD	6TH DAY	NO	NO	NO	Y	Y	Y	N	N	N	ABNORMAL	6DAYS	Y	Y	N	Y	Y(ACINETOBACTER SPECIES)	45.39	44.28	EXPIRED
CA27	1700252/A	PRE(34WK)	MALE	1.65KG	INBORN	NVD	3RD DAY	Y	Y	NO	NO	Y	NO	N	N	N	ABNORMAL	16DAYS	Y	N	Y	Y	Y(CITROBACTER SPECIES)	39.32	14.01	IMPROVED
CA28	1700272/A	TERM	FEMALE	2.4KG	OUTBORN	NVD	1ST DAY	NO	Y	Y	NO	Y	NO	ABNORMAL	ABNORMAL	N	ABNORMAL	16DAYS	Y	N	N	Y	Y(PSEUDOMONAS SPECIES)	43.11	44.67	EXPIRED
CA29	1700269/A	PRE(36WK)	FEMALE	1.73KG	INBORN	EM LSCS	6TH DAY	NO	Y	Y	NO	Y	NO	N	ABNORMAL	N	ABNORMAL	13DAYS	Y	N	Y	Y	N	21.37	6.42	IMPROVED
CA30	1700370/C	TERM	MALE	2.28KG	INBORN	NVD	4TH DAY	Y	NO	NO	NO	Y	NO	N	N	N	N	14DAYS	Y	N	Y	Y	Y(E COLI)	37.39	11.01	IMPROVED
CA31	1700302/A	TERM	MALE	2.44KG	INBORN	NVD	4TH DAY	Y	NO	NO	Y	Y	NO	N	N	N	ABNORMAL	6DAYS	Y	N	N	Y	N	21.27	4.41	IMPROVED
CA32	1700408/B	PRE(36WK)	FEMALE	2.3KG	INBORN	NVD	3RD DAY	NO	NO	NO	Y	Y	NO	N	N	N	ABNORMAL	7DAYS	Y	N	Y	Y	N	31.47	6.12	IMPROVED
CA33	1700520/B	TERM	MALE	2.44KG	INBORN	NVD	4TH DAY	Y	NO	NO	Y	Y	NO	N	N	N	ABNORMAL	7DAYS	Y	Y	N	Y	N	28.42	5.38	IMPROVED
CA34	1700314/A	TERM	MALE	2.4KG	INBORN	NVD	7TH DAY	NO	Y	NO	Y	Y	Y	ABNORMAL	N	ABNORMAL	ABNORMAL	14DAYS	Y	Y	Y	Y	Y(ACINETOBACTER SPECIES)	39.48	21.02	IMPROVED
CA35	1700381/B	PRE(34WK)	FEMALE	1.76KG	INBORN	NVD	6TH DAY	Y	Y	Y	Y	NO	Y	ABNORMAL	ABNORMAL	ABNORMAL	ABNORMAL	11DAYS	Y	N	Y	Y	N	36.32	43.81	EXPIRED
CA36	1700557/A	TERM	FEMALE	2.1KG	INBORN	NVD	6TH DAY	NO	NO	NO	Y	Y	NO	N	N	N	N	14DAYS	Y	Y	N	Y	Y(MRSA)	36.36	11.42	IMPROVED
CA37	1700545/A	PRE(36WK)	MALE	2.27KG	INBORN	EM LSCS	2ND DAY	Y	NO	NO	Y	Y	NO	N	N	N	N	12DAYS	N	N	Y	Y	Y(CONS)	35.42	14.27	IMPROVED
CA38	1700510/C	TERM	MALE	2.76KG	INBORN	NVD	2ND DAY	Y	NO	NO	Y	Y	NO	N	N	N	ABNORMAL	6DAYS	Y	N	N	Y	N	28.42	7.08	IMPROVED
CA39	1700593/C	TERM	MALE	2.45KG	INBORN	NVD	2ND DAY	Y	NO	NO	Y	Y	NO	N	N	N	N	7DAYS	Y	Y	Y	N	N	33.28	4.12	IMPROVED
CA40	1700615/C	TERM	MALE	2.44KG	INBORN	NVD	6TH DAY	Y	NO	NO	Y	Y	NO	N	N	N	ABNORMAL	8DAYS	Y	N	Y	Y	N	27.72	7.01	IMPROVED
CA41	1700619/C	PRE(36WK)	FEMALE	2.12KG	INBORN	NVD	5TH DAY	Y	NO	NO	Y	Y	NO	N	N	ABNORMAL	N	10DAYS	Y	Y	N	Y	N	31.82	9.07	IMPROVED
CA42	1700682/A	TERM	MALE	2.05KG	INBORN	NVD	5TH DAY	Y	NO	NO	Y	Y	NO	N	N	N	N	7DAYS	Y	Y	Y	N	N	26.42	7.87	IMPROVED
CA43	1700575/B	TERM	FEMALE	2.94KG	INBORN	NVD	4TH DAY	NO	Y	Y	NO	Y	NO	ABNORMAL	ABNORMAL	N	ABNORMAL	9DAYS	Y	N	Y	Y	Y(KLEBSIELLA SPECIES)	39.89	43.72	EXPIRED
CA44	1700724/C	TERM	MALE	2.53KG	INBORN	NVD	2ND DAY	Y	Y	NO	Y	Y	NO	N	N	ABNORMAL	ABNORMAL	9DAYS	Y	Y	Y	N	N	31.77	11.08	IMPROVED
CA45	1700738/C	TERM	MALE	4.02KG	INBORN	EM LSCS	3RD DAY	NO	NO	NO	Y	Y	NO	N	N	N	ABNORMAL	8DAYS	Y	N	Y	Y	N	28.13	6.21	IMPROVED
CA46	1700754/A	TERM	MALE	3.2KG	INBORN	NVD	4TH DAY	Y	NO	NO	Y	Y	NO	N	N	ABNORMAL	ABNORMAL	13DAYS	Y	N	N	Y	Y(CANDIDA KRUSEI)	29.87	14.21	IMPROVED
CA47	1700759/A	PRE(36WK)	FEMALE	2.11KG	INBORN	NVD	3RD DAY	Y	NO	NO	Y	Y	NO	N	N	N	ABNORMAL	16DAYS	Y	N	Y	Y	N	37.31	43.86	EXPIRED
CA48	1700658/B	TERM	FEMALE	2.81KG	INBORN	NVD	4TH DAY	Y	Y	NO	NO	Y	NO	N	N	N	ABNORMAL	7DAYS	N	N	Y	Y	N	33.21	7.82	IMPROVED
CA49	1700782/C	PRE(34WK)	FEMALE	1.82KG	INBORN	NVD	3RD DAY	Y	Y	Y	NO	Y	NO	N	ABNORMAL	N	ABNORMAL	7DAYS	Y	Y	Y	Y	N	43.72	40.81	EXPIRED
CA50	1700807/B	TERM	MALE	2.44KG	INBORN	NVD	2ND DAY	NO	Y	Y	NO	Y	NO	ABNORMAL	ABNORMAL	N	ABNORMAL	9DAYS	Y	Y	Y	Y	Y(ACINETOBACTER SPECIES)	29.42	41.87	EXPIRED
CA51	1700873/B	PRE(34WK)	MALE	1.43KG	INBORN	EM LSCS	3RD DAY	Y	Y	NO	Y	Y	NO	N	ABNORMAL	N	ABNORMAL	9DAYS	Y	Y	Y	Y	N	31.43	36.82	EXPIRED
CA52	1700884/A	PRE(34WK)	MALE	1.4KG	INBORN	EM LSCS	5TH DAY	Y	NO	NO	NO	Y	NO	N	N	N	ABNORMAL	13DAYS	Y	N	Y	Y	N	28.32	21.76	IMPROVED
CA53	1700832/C	TERM	MALE	2.35KG	INBORN	NVD	2ND DAY	Y	NO	NO	NO	Y	NO	N	N	N	ABNORMAL	16DAYS	Y	N	Y	Y	Y(KLEBSIELLA SPECIES)	36.12	14.83	IMPROVED
CA54	1700818/B	TERM	FEMALE	3.12KG	INBORN	NVD	4TH DAY	Y	NO	NO	Y	Y	NO	N	N	N	ABNORMAL	8DAYS	Y	Y	Y	Y	N	33.76	4.28	IMPROVED
